# Supplementary material for: Heterometallic CuII/LnIII polymers active in the catalytic aerobic oxidation of cycloalkenes under solvent-free conditions
Source: Royal Society of Chemistry journal article supplement (doi:10.1039/c8dt01913d), 2018-01-01
Supplement: c8dt01913d1.pdf [file c8dt01913d1.pdf]

# Heterometallic Cu<sup>II</sup>/Ln<sup>III</sup> Polymers Active in the Catalytic Aerobic Oxidation of Cycloalkenes in Solvent- Free Conditions.

## Supplementary Material

P. Cancino<sup>a,b</sup>, L. Santibañez<sup>a</sup>, P. Fuentealba<sup>a,b</sup>, C. Olea<sup>a</sup>, A. Vega<sup>b,c</sup>, E. Spodine<sup>a,b\*</sup>.

<sup>a</sup> *Facultad de Ciencias Químicas y Farmacéuticas, Universidad de Chile, Santiago, Chile.*

<sup>b</sup> *Centro para el Desarrollo de la Nanociencia y la Nanotecnología, CEDENNA, Santiago, Chile*

<sup>c</sup> *Facultad de Ciencias Exactas, Dpto. de Ciencias Químicas, Universidad Andrés Bello, Viña del Mar, Chile.*

\*e-mail: [espodine@uchile.cl](mailto:espodine@uchile.cl)

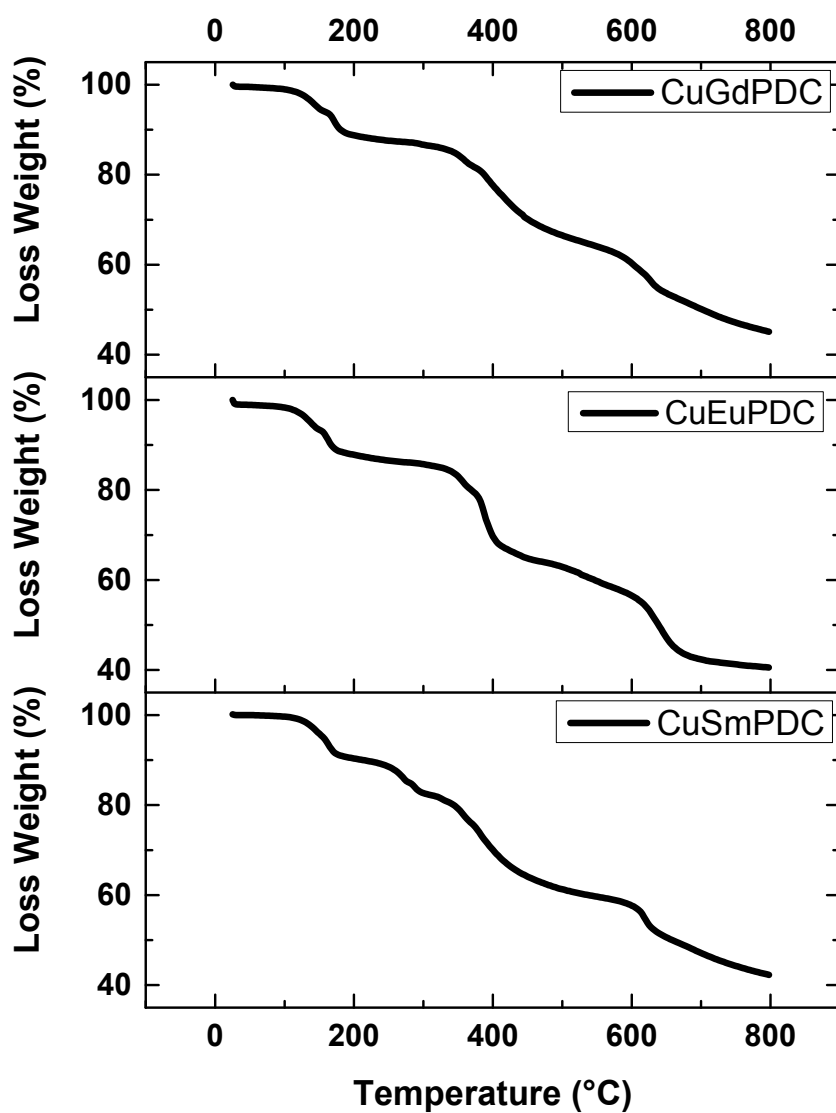

**FigureS1.** Thermal analysis for  $\{[\text{CuLn}_2(\text{PDC})_2(\text{SO}_4)_2(\text{H}_2\text{O})_6] \cdot \text{H}_2\text{O}\}_n$  ( $\text{Ln}^{\text{III}}$ : Sm, Eu or Gd)

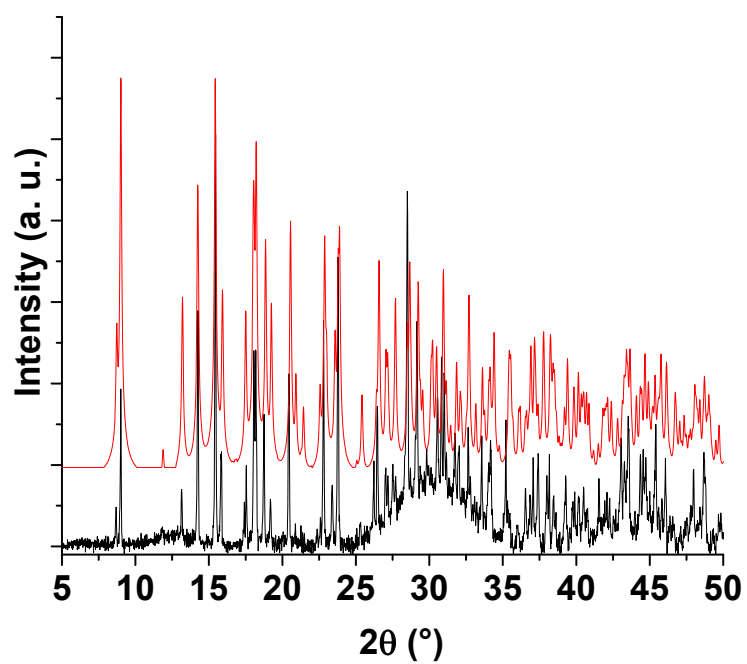

**Figure S2.** Comparison between de experimental powder diffraction patterns of CuSmPDC (----) with simulated diffractogram from single crystal parameters (----).

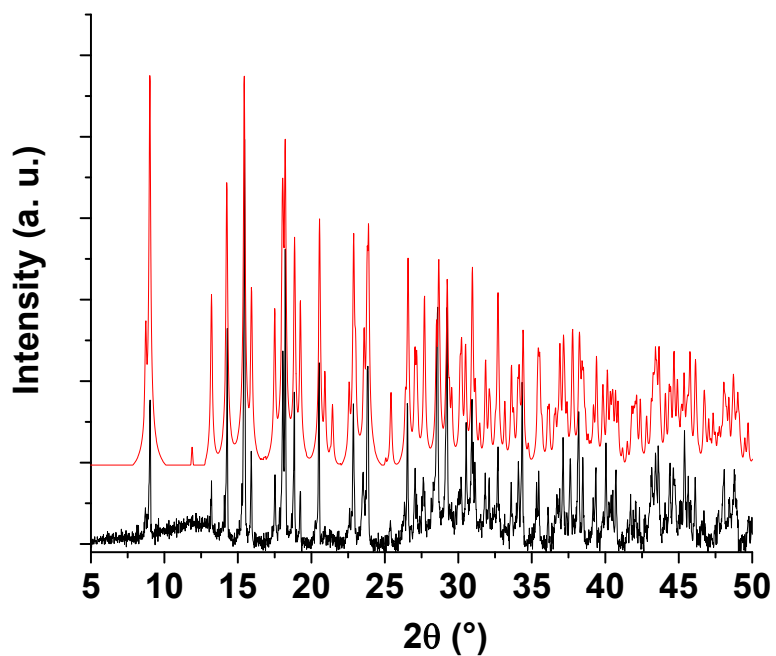

**Figure S3.** Comparison between de experimental powder diffraction pattern of CuEuPDC (----) with simulated diffractogram from single crystal parameters (----).

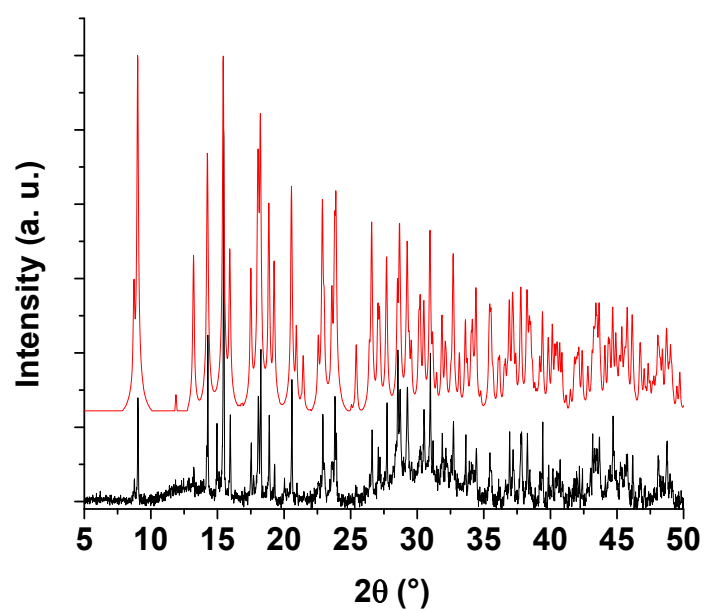

**Figure S4.** Comparison between de experimental powder diffraction pattern of CuGdPDC (----) with simulated diffractogram from single crystal parameters (----).

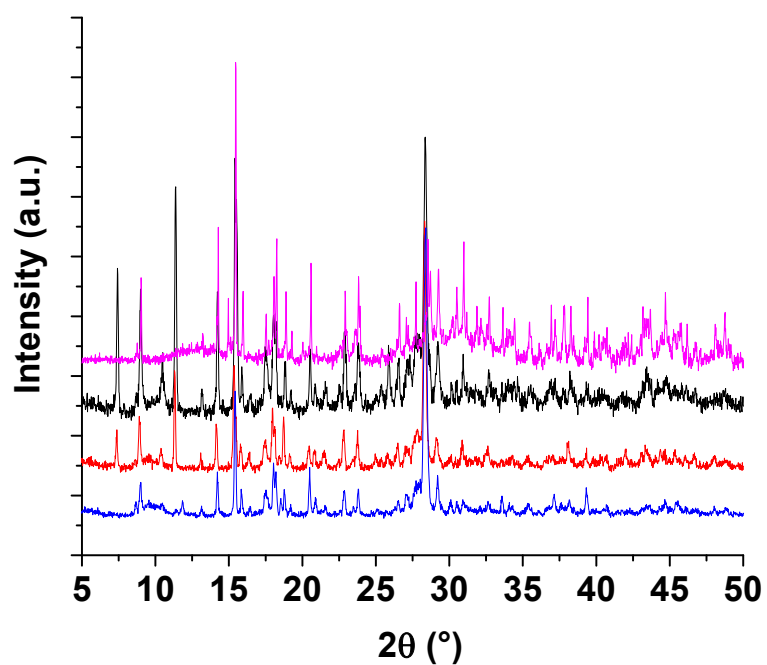

**Figure S5.** Powder X-ray diffraction pattern of CuSmPDC after different catalytic cycles. --- pristine catalyst, --- after first cycle, --- after second cycle, --- after fourth cycle.

| MBET summary                 |                         |
|------------------------------|-------------------------|
| Slope =                      | 4422.488                |
| Intercept =                  | 1.515e+02               |
| Correlation coefficient, r = | 0.999515                |
| C constant =                 | 30.185                  |
| Surface Area =               | 0.761 m <sup>2</sup> /g |

| Multi-Point BET          |                     |                       |                          |                     |                       |
|--------------------------|---------------------|-----------------------|--------------------------|---------------------|-----------------------|
| Relative Pressure [P/Po] | Volume @ STP [cc/g] | 1 / [ W((Po/P) - 1) ] | Relative Pressure [P/Po] | Volume @ STP [cc/g] | 1 / [ W((Po/P) - 1) ] |
| 5.43480e-02              | 0.1223              | 3.7600e+02            | 2.44712e-01              | 0.2089              | 1.2411e+03            |
| 1.16199e-01              | 0.1556              | 6.7611e+02            | 3.06234e-01              | 0.2367              | 1.4918e+03            |
| 1.78408e-01              | 0.1824              | 9.5244e+02            |                          |                     |                       |

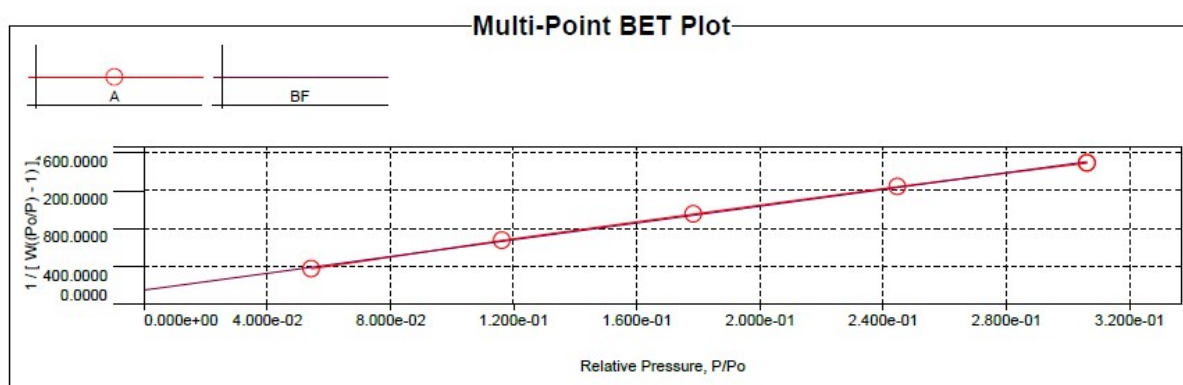

**Figure S6.** Nitrogen sorptometry for CuGdPDC.

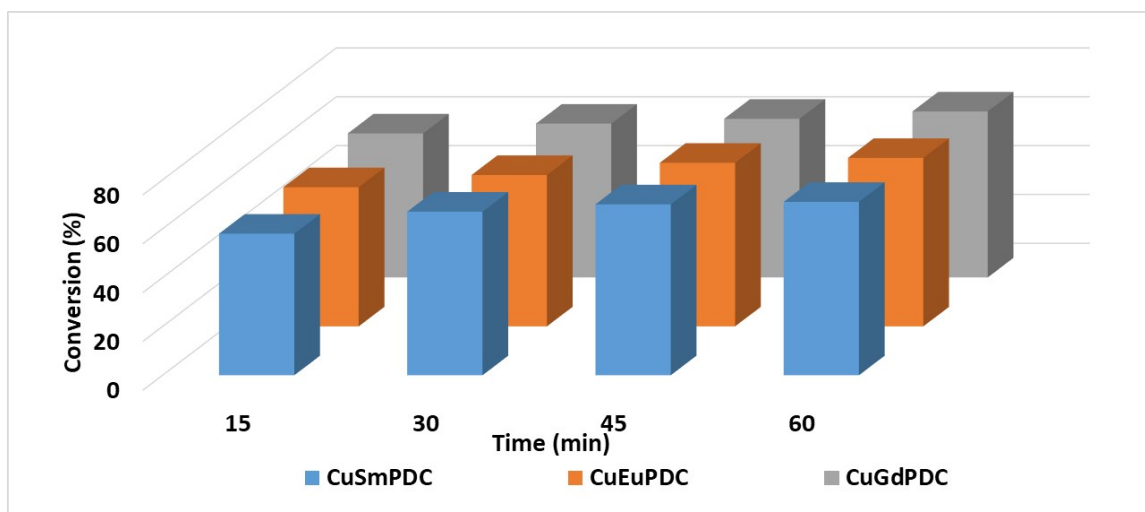

**Figure S7.** Temporal evolution of the conversion for the oxidation of cyclohexene using the different catalysts.

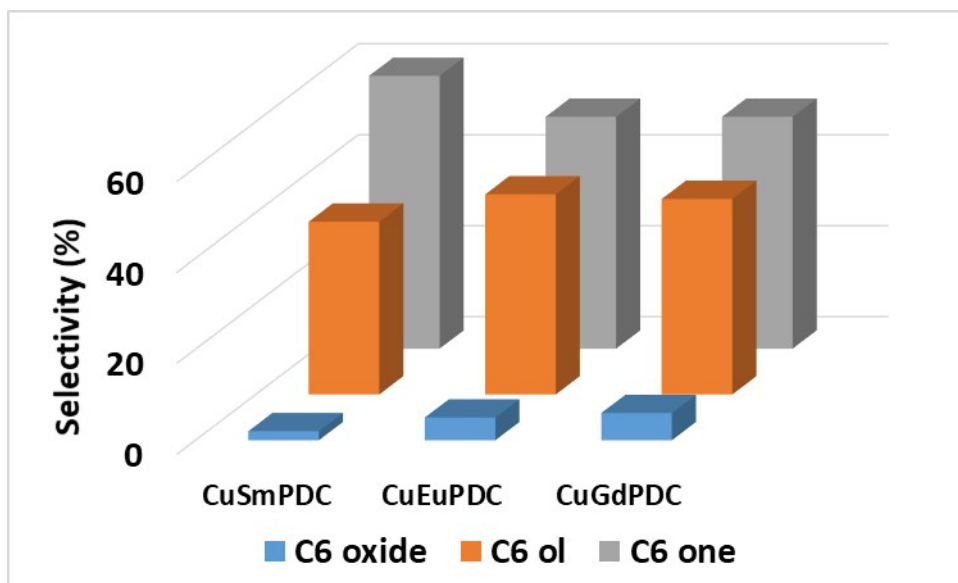

**Figure S8.** Selectivity after 1 h of reaction for the oxidation of cyclohexene using the different catalysts.

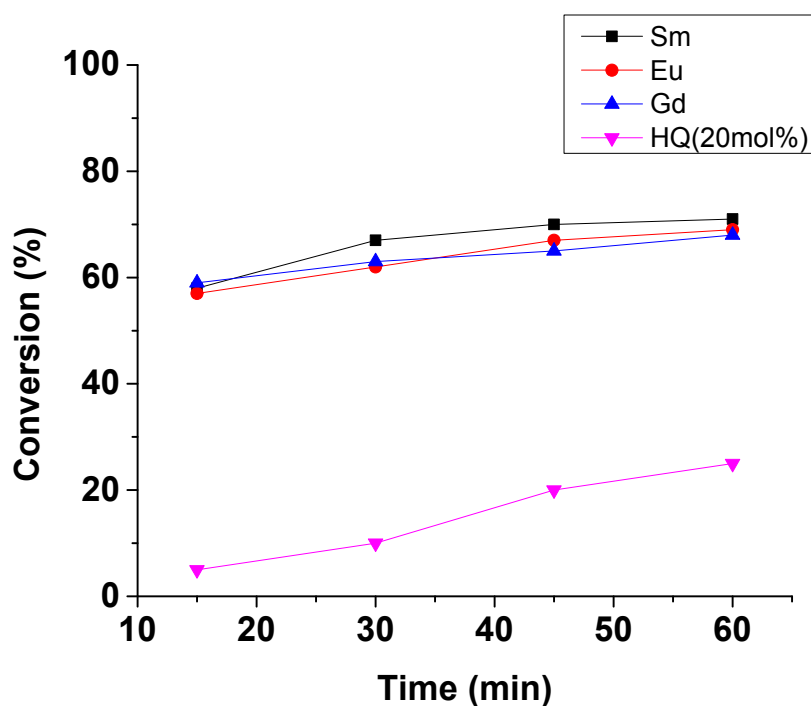

**Figure S9.** Temporal evolution of the conversion for the oxidation of cyclohexene using the different catalysts. (■) CuSmPDC; (●) CuEuPDC; (▲) CuSmPDC; (▼) Hydroquinone (20 mol% in relationship with substrate).

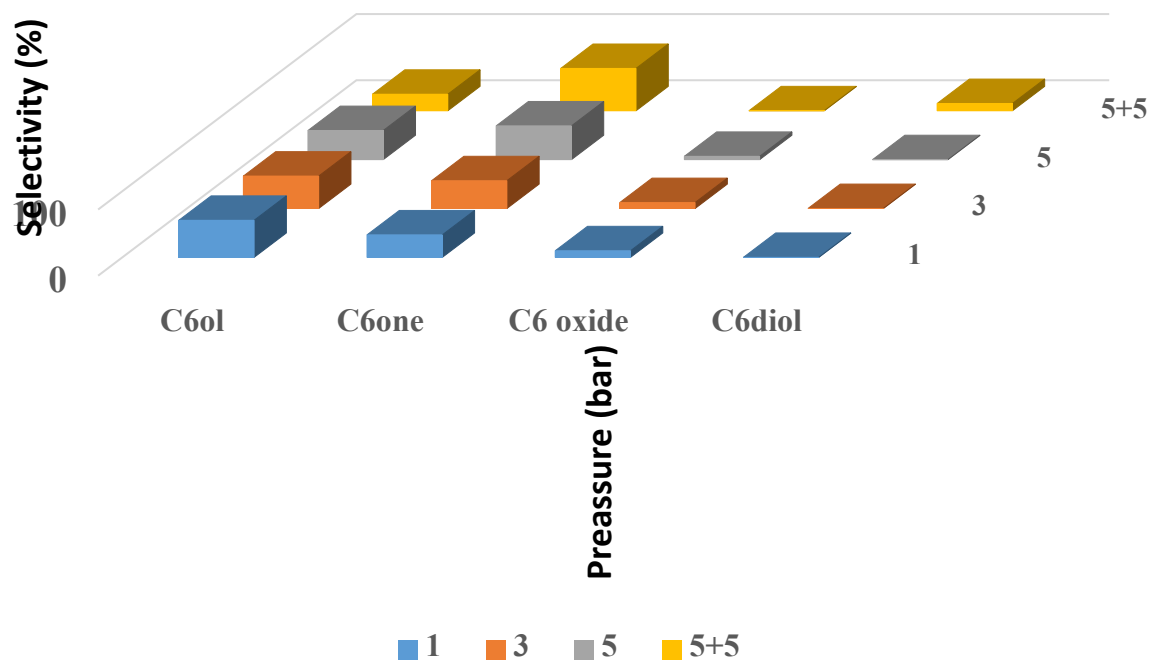

**Figure S10.** Dependence of the selectivity with oxygen pressure, using CuSmPDC as catalyst and cyclohexene as substrate

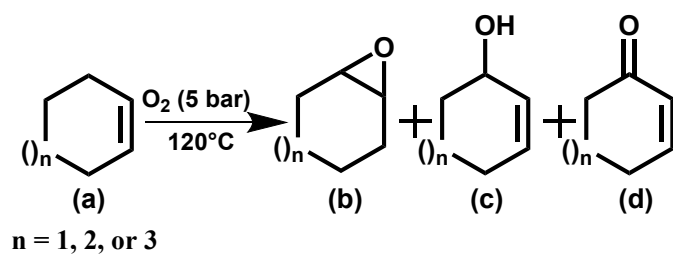

**Scheme S1.** Products obtained from the oxidation of cycloalkenes. (a) alkene; (b) epoxide; (c) conjugated alcohol; (d) conjugated ketone.

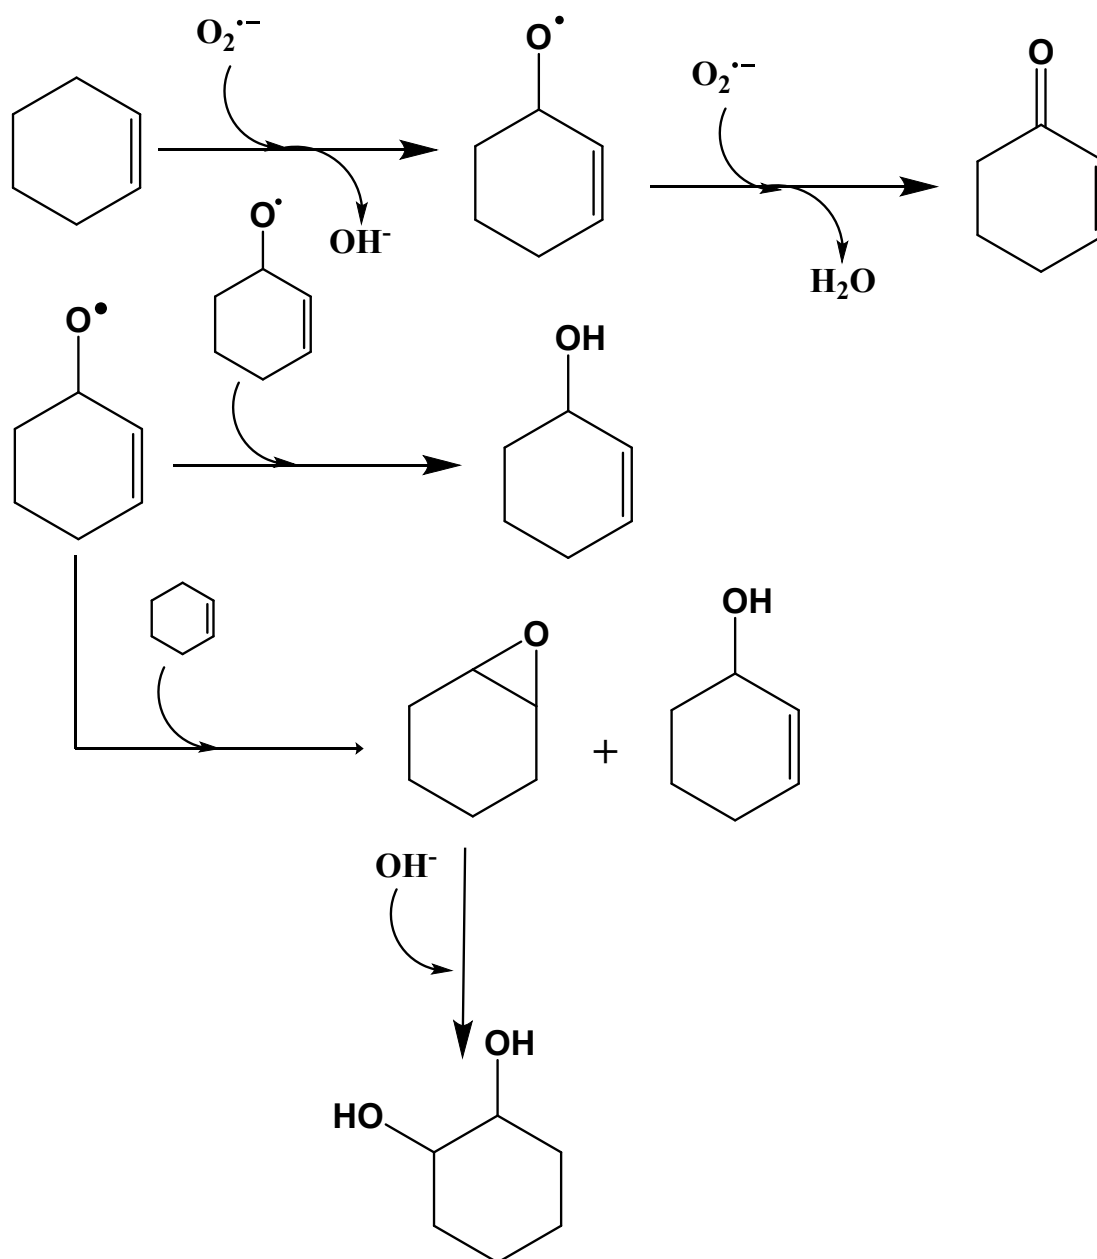

**Scheme S2.** Radical mechanism proposed for aerobic oxidation of cyclohexene.



**Table S1.** Crystal data and structure refinement details for **CuSmPDC**, **CuEuPDC**, **CuGdPDC**

|                                                                             | <b>CuSmPDC</b>              | <b>CuEuPDC</b>              | <b>CuGdPDC</b>              |
|-----------------------------------------------------------------------------|-----------------------------|-----------------------------|-----------------------------|
| <b>FW/uma</b>                                                               | 1000.61                     | 1015.93                     | 1026.49                     |
| <b>Crystal System</b>                                                       | Triclinic                   | Triclinic                   | Triclinic                   |
| <b>Space Group</b>                                                          | $P\bar{1}$                  | $P\bar{1}$                  | $P\bar{1}$                  |
| <b>a (Å)</b>                                                                | 6.3502(16)                  | 6.3414(14)                  | 6.3399(9)                   |
| <b>b (Å)</b>                                                                | 10.056(3)                   | 10.023(2)                   | 10.0110(14)                 |
| <b>c (Å)</b>                                                                | 10.316(3)                   | 10.260(2)                   | 10.2144(14)                 |
| <b><math>\alpha</math> (°)</b>                                              | 95.008(3)                   | 95.008(6)                   | 95.020(2)                   |
| <b><math>\beta</math> (°)</b>                                               | 95.640(3)                   | 95.330(6)                   | 95.038(2)                   |
| <b><math>\gamma</math> (°)</b>                                              | 99.677(3)                   | 99.785(6)                   | 99.872(2)                   |
| <b>V (Å<sup>3</sup>)</b>                                                    | 642.6(3)                    | 636.3(2)                    | 636.3(2)                    |
| <b>Z(Z')</b>                                                                | 1(2)                        | 1(2)                        | 1(2)                        |
| <b>d (g cm<sup>-3</sup>)</b>                                                | 2.586                       | 2.651                       | 2.694                       |
| <b><math>\mu</math> (mm<sup>-1</sup>)</b>                                   | 5.60                        | 5.97                        | 6.29                        |
| <b>F(000)</b>                                                               | 475                         | 489                         | 491                         |
| <b><math>\theta</math> range</b>                                            | 2.3–29.9                    | 2.3–29.2                    | 2.7–30.1                    |
| <b>hkl range</b>                                                            | $-7 \leq h \leq 7$          | $-7 \leq h \leq 7$          | $-8 \leq h \leq 8$          |
|                                                                             | $-12 \leq l \leq 12$        | $-12 \leq l \leq 12$        | $-13 \leq l \leq 14$        |
|                                                                             | $-12 \leq k \leq 12$        | $-12 \leq k \leq 12$        | $-14 \leq k \leq 14$        |
| <b>N<sub>tot</sub>, N<sub>uniq</sub> (R<sub>int</sub>), N<sub>obs</sub></b> | 4925, 2531 (0.044),<br>2348 | 4784, 2481 (0.021),<br>2328 | 6784, 3484 (0.024),<br>3341 |
| <b>Ref. Parameters</b>                                                      | 173                         | 237                         | 237                         |
| <b>GOF</b>                                                                  | 1.08                        | 1.05                        | 1.14                        |
| <b>R1, wR2 (obs)</b>                                                        | 0.046, 0.126                | 0.020, 0.041                | 0.023, 0.055                |
| <b>Max. and min <math>\Delta\rho</math> e Å<sup>-3</sup></b>                | 2.47 and -3.39              | 0.53 and -0.62              | 0.77 and -1.68              |

**Table S2.** Selected bond distances (Å), angles (°) and torsion angles (°) for compounds **CuSmPDC**, **CuEuPDC**, and **CuGdPDC**, as determined by X-rays diffraction.

| <b>CuSmPDC</b>                            |            |                                        |            |
|-------------------------------------------|------------|----------------------------------------|------------|
| O6—C1                                     | 1.261(8)   | Sm1—O8                                 | 2.515(5)   |
| O6—Sm1 <sup>i</sup>                       | 2.400(4)   | Sm1—O2                                 | 2.521(5)   |
| O9—C1                                     | 1.259(9)   | Cu1—N1 <sup>vii</sup>                  | 1.990(6)   |
| O9—Sm1 <sup>ii</sup>                      | 2.331(5)   | Cu1—N1                                 | 1.990(6)   |
| O7—Sm1 <sup>iii</sup>                     | 2.418(5)   | Cu1—O10 <sup>vii</sup>                 | 2.016(6)   |
| Cu1—O3 <sup>vii</sup>                     | 2.370(6)   | Cu1—O10                                | 2.016(6)   |
| Cu1—O3                                    | 2.370(6)   | O4—Sm1 <sup>v</sup>                    | 2.396(5)   |
| Sm1—O9 <sup>iv</sup>                      | 2.331(5)   | Sm1—O7 <sup>vi</sup>                   | 2.418(5)   |
| Sm1—O4 <sup>v</sup>                       | 2.396(5)   | Sm1—O5                                 | 2.449(5)   |
| Sm1—O6 <sup>i</sup>                       | 2.400(4)   | Sm1—O1                                 | 2.458(6)   |
|                                           |            |                                        |            |
| N1 <sup>vii</sup> —Cu1—N1                 | 180.0      | O9 <sup>iv</sup> —Sm1—O2               | 144.37(19) |
| N1 <sup>vii</sup> —Cu1—O10 <sup>vii</sup> | 91.6(3)    | O4 <sup>v</sup> —Sm1—O2                | 75.35(18)  |
| N1—Cu1—O10 <sup>vii</sup>                 | 88.4(3)    | O6 <sup>i</sup> —Sm1—O2                | 80.08(17)  |
| N1 <sup>vii</sup> —Cu1—O10                | 88.4(3)    | O7 <sup>vi</sup> —Sm1—O2               | 129.41(17) |
| N1—Cu1—O10                                | 91.6(3)    | O5—Sm1—O2                              | 70.01(18)  |
| O10 <sup>vii</sup> —Cu1—O10               | 180.0      | O1—Sm1—O2                              | 56.18(17)  |
| N1 <sup>vii</sup> —Cu1—O3 <sup>vii</sup>  | 86.4(2)    | O8—Sm1—O2                              | 116.75(19) |
| N1—Cu1—O3 <sup>vii</sup>                  | 93.6(2)    | O9 <sup>iv</sup> —Sm1—O4 <sup>v</sup>  | 87.18(18)  |
| O10 <sup>vii</sup> —Cu1—O3 <sup>vii</sup> | 93.3(3)    | O9 <sup>iv</sup> —Sm1—O6 <sup>i</sup>  | 100.62(17) |
| O10—Cu1—O3 <sup>vii</sup>                 | 86.7(3)    | O4 <sup>v</sup> —Sm1—O6 <sup>i</sup>   | 146.87(18) |
| N1 <sup>vii</sup> —Cu1—O3                 | 93.6(2)    | O9 <sup>iv</sup> —Sm1—O7 <sup>vi</sup> | 83.28(18)  |
| N1—Cu1—O3                                 | 86.4(2)    | O4 <sup>v</sup> —Sm1—O7 <sup>vi</sup>  | 140.24(17) |
| O10 <sup>vii</sup> —Cu1—O3                | 86.7(3)    | O6 <sup>i</sup> —Sm1—O7 <sup>vi</sup>  | 72.89(16)  |
| O10—Cu1—O3                                | 93.3(3)    | O9 <sup>iv</sup> —Sm1—O5               | 76.01(18)  |
| O3 <sup>vii</sup> —Cu1—O3                 | 180.0      | O4 <sup>v</sup> —Sm1—O5                | 77.22(18)  |
| O4 <sup>v</sup> —Sm1—O1                   | 92.7(2)    | O6 <sup>i</sup> —Sm1—O5                | 73.66(17)  |
| O6 <sup>i</sup> —Sm1—O1                   | 91.8(2)    | O7 <sup>vi</sup> —Sm1—O5               | 136.23(18) |
| O7 <sup>vi</sup> —Sm1—O1                  | 82.45(18)  | O9 <sup>iv</sup> —Sm1—O1               | 157.4(2)   |
| O5—Sm1—O1                                 | 125.98(18) | O7 <sup>vi</sup> —Sm1—O8               | 71.04(17)  |
| O9 <sup>iv</sup> —Sm1—O8                  | 84.3(2)    | O5—Sm1—O8                              | 142.09(18) |
| O4 <sup>v</sup> —Sm1—O8                   | 69.65(19)  | O1—Sm1—O8                              | 74.5(2)    |

---

**Symmetry codes:** (i)  $-x+1, -y, -z+1$ ; (ii)  $x-1, y-1, z$ ; (iii)  $x-1, y, z$ ; (iv)  $x+1, y+1, z$ ; (v)  $-x+2, -y+1, -z+2$ ; (vi)  $x+1, y, z$ ; (vii)  $-x+1, -y, -z+2$ .

**CuEuPDC**

|                                          |           |                                         |           |
|------------------------------------------|-----------|-----------------------------------------|-----------|
| Eu1—O1                                   | 2.318(2)  | O2—Eu1 <sup>ii</sup>                    | 2.388(2)  |
| Eu1—O8 <sup>i</sup>                      | 2.374(2)  | Eu1—O6                                  | 2.443(2)  |
| Eu1—O2 <sup>ii</sup>                     | 2.388(2)  | Eu1—O10W                                | 2.494(3)  |
| Eu1—O3 <sup>iii</sup>                    | 2.402(2)  | Eu1—O5                                  | 2.511(2)  |
| Eu1—O9W                                  | 2.436(3)  | O3—Eu1 <sup>vi</sup>                    | 2.402(2)  |
| O7—Cu1 <sup>vii</sup>                    | 2.363(3)  | O8—Eu1 <sup>i</sup>                     | 2.374(2)  |
| Cu1—N1                                   | 1.986(3)  | Cu1—O7 <sup>i</sup>                     | 2.363(3)  |
| Cu1—N1 <sup>iv</sup>                     | 1.986(3)  | Cu1—O7 <sup>v</sup>                     | 2.363(3)  |
| Cu1—O11W <sup>iv</sup>                   | 2.020(3)  | Cu1—O11W                                | 2.020(3)  |
|                                          |           |                                         |           |
| O1—Eu1—O8 <sup>i</sup>                   | 87.27(8)  | O11W—Cu1—O7 <sup>i</sup>                | 86.67(13) |
| O1—Eu1—O2 <sup>ii</sup>                  | 100.39(8) | N1—Cu1—O7 <sup>v</sup>                  | 86.82(10) |
| O8 <sup>i</sup> —Eu1—O2 <sup>ii</sup>    | 146.67(9) | N1 <sup>iv</sup> —Cu1—O7 <sup>v</sup>   | 93.18(10) |
| O1—Eu1—O3 <sup>iii</sup>                 | 83.39(8)  | O11W <sup>iv</sup> —Cu1—O7 <sup>v</sup> | 86.67(13) |
| O8 <sup>i</sup> —Eu1—O3 <sup>iii</sup>   | 140.32(8) | O11W—Cu1—O7 <sup>v</sup>                | 93.33(13) |
| O2 <sup>ii</sup> —Eu1—O3 <sup>iii</sup>  | 73.00(8)  | O7 <sup>i</sup> —Cu1—O7 <sup>v</sup>    | 180.0     |
| O1—Eu1—O9W                               | 76.11(9)  | O1—Eu1—O6                               | 157.25(9) |
| O8 <sup>i</sup> —Eu1—O9W                 | 76.87(9)  | O8 <sup>i</sup> —Eu1—O6                 | 93.01(8)  |
| O2 <sup>ii</sup> —Eu1—O9W                | 73.71(8)  | O2 <sup>ii</sup> —Eu1—O6                | 91.83(8)  |
| O3 <sup>iii</sup> —Eu1—O9W               | 136.63(8) | O3 <sup>iii</sup> —Eu1—O6               | 81.93(8)  |
| O1—Eu1—O10W                              | 84.42(10) | O9W—Eu1—O6                              | 126.10(9) |
| O8 <sup>i</sup> —Eu1—O10W                | 69.80(9)  | O3 <sup>iii</sup> —Eu1—O5               | 128.98(8) |
| O2 <sup>ii</sup> —Eu1—O10W               | 142.79(9) | O9W—Eu1—O5                              | 70.07(8)  |
| O3 <sup>iii</sup> —Eu1—O10W              | 70.95(9)  | O6—Eu1—O5                               | 56.23(8)  |
| O9W—Eu1—O10W                             | 141.99(9) | O10W—Eu1—O5                             | 116.70(9) |
| O6—Eu1—O10W                              | 74.40(10) | O8 <sup>i</sup> —Eu1—O5                 | 75.51(8)  |
| O1—Eu1—O5                                | 144.65(9) | O2 <sup>ii</sup> —Eu1—O5                | 80.00(8)  |
| N1—Cu1—N1 <sup>iv</sup>                  | 180.0     | O11W <sup>iv</sup> —Cu1—O11W            | 180.0     |
| N1—Cu1—O11W <sup>iv</sup>                | 88.44(12) | N1—Cu1—O7 <sup>i</sup>                  | 93.18(10) |
| N1 <sup>iv</sup> —Cu1—O11W <sup>iv</sup> | 91.56(12) | N1 <sup>iv</sup> —Cu1—O7 <sup>i</sup>   | 86.82(10) |
| N1—Cu1—O11W                              | 91.56(12) | O11W <sup>iv</sup> —Cu1—O7 <sup>i</sup> | 93.33(13) |
| N1 <sup>iv</sup> —Cu1—O11W               | 88.44(12) |                                         |           |

**Symmetry codes:** (i)  $-x+1, -y+2, -z$ ; (ii)  $-x+1, -y+2, -z+1$ ; (iii)  $x, y+1, z$ ; (iv)  $-x, -y+1, -z$ ; (v)  $x-1, y-1, z$ ; (vi)  $x, y-1, z$ ; (vii)  $x+1, y+1, z$ .

---

**CuGdPDC**

---

|                                         |           |                                      |           |
|-----------------------------------------|-----------|--------------------------------------|-----------|
| Gd1—O8 <sup>i</sup>                     | 2.309(2)  | O5—Gd1 <sup>ii</sup>                 | 2.361(2)  |
| Gd1—O5 <sup>ii</sup>                    | 2.361(2)  | O6—Gd1 <sup>vi</sup>                 | 2.386(2)  |
| Gd1—O7 <sup>iii</sup>                   | 2.376(2)  | O7—Gd1 <sup>iii</sup>                | 2.376(2)  |
| Gd1—O6 <sup>iv</sup>                    | 2.386(2)  | O8—Gd1 <sup>vii</sup>                | 2.309(2)  |
| Gd1—O10                                 | 2.429(2)  | Cu2—N1                               | 1.989(3)  |
| Gd1—O3                                  | 2.432(3)  | Cu2—O1 <sup>v</sup>                  | 2.015(3)  |
| Gd1—O11                                 | 2.484(3)  | Cu2—O1                               | 2.015(3)  |
| Gd1—O4                                  | 2.500(2)  | Cu2—O2                               | 2.358(3)  |
| Cu2—N1 <sup>v</sup>                     | 1.989(3)  | Cu2—O2 <sup>v</sup>                  | 2.358(3)  |
|                                         |           |                                      |           |
| O8 <sup>i</sup> —Gd1—O5 <sup>ii</sup>   | 87.09(8)  | O5 <sup>ii</sup> —Gd1—O4             | 75.55(9)  |
| O8 <sup>i</sup> —Gd1—O7 <sup>iii</sup>  | 100.49(8) | O7 <sup>iii</sup> —Gd1—O4            | 79.75(8)  |
| O5 <sup>ii</sup> —Gd1—O7 <sup>iii</sup> | 146.25(9) | O6 <sup>iv</sup> —Gd1—O4             | 129.10(8) |
| O8 <sup>i</sup> —Gd1—O6 <sup>iv</sup>   | 83.23(8)  | O10—Gd1—O4                           | 69.95(8)  |
| O5 <sup>ii</sup> —Gd1—O6 <sup>iv</sup>  | 140.73(9) | O3—Gd1—O4                            | 56.60(8)  |
| O7 <sup>iii</sup> —Gd1—O6 <sup>iv</sup> | 73.02(8)  | O11—Gd1—O4                           | 116.91(9) |
| O8 <sup>i</sup> —Gd1—O10                | 76.14(9)  | N1 <sup>v</sup> —Cu2—N1              | 180.0     |
| O5 <sup>ii</sup> —Gd1—O10               | 76.46(8)  | N1 <sup>v</sup> —Cu2—O1 <sup>v</sup> | 91.80(12) |
| O7 <sup>iii</sup> —Gd1—O10              | 73.65(8)  | N1—Cu2—O1 <sup>v</sup>               | 88.20(12) |
| O6 <sup>iv</sup> —Gd1—O10               | 136.46(8) | N1 <sup>v</sup> —Cu2—O1              | 88.20(12) |
| O8 <sup>i</sup> —Gd1—O3                 | 157.00(9) | N1—Cu2—O1                            | 91.80(12) |
| O5 <sup>ii</sup> —Gd1—O3                | 93.52(9)  | O1 <sup>v</sup> —Cu2—O1              | 180.0     |
| O7 <sup>iii</sup> —Gd1—O3               | 91.72(9)  | N1 <sup>v</sup> —Cu2—O2              | 92.89(11) |
| O6 <sup>iv</sup> —Gd1—O3                | 81.81(8)  | N1—Cu2—O2                            | 87.11(11) |
| O10—Gd1—O3                              | 126.35(9) | O1 <sup>v</sup> —Cu2—O2              | 86.31(15) |
| O8 <sup>i</sup> —Gd1—O11                | 84.28(10) | O1—Cu2—O2                            | 93.69(15) |
| O5 <sup>ii</sup> —Gd1—O11               | 70.09(9)  | N1 <sup>v</sup> —Cu2—O2 <sup>v</sup> | 87.11(11) |
| O7 <sup>iii</sup> —Gd1—O11              | 142.96(9) | N1—Cu2—O2 <sup>v</sup>               | 92.89(11) |
| O6 <sup>iv</sup> —Gd1—O11               | 71.12(9)  | O1 <sup>v</sup> —Cu2—O2 <sup>v</sup> | 93.69(15) |
| O10—Gd1—O11                             | 141.87(9) | O1—Cu2—O2 <sup>v</sup>               | 86.31(15) |
| O3—Gd1—O11                              | 74.40(11) | O2—Cu2—O2 <sup>v</sup>               | 180.0     |
| O8 <sup>i</sup> —Gd1—O4                 | 144.59(8) |                                      |           |

---

**Symmetry codes:** (i)  $x+1, y+1, z$ ; (ii)  $-x+2, -y+1, -z+2$ ; (iii)  $-x+1, -y, -z+1$ ; (iv)  $x+1, y, z$ ; (v)  $-x+1, -y, -z+2$ ; (vi)  $x-1, y, z$ ; (vii)  $x-1, y-1, z$ .

**Table S3.** Oxidation of cyclohexene at 1 hour using CuLnPDC (Ln: Sm<sup>III</sup>, Eu<sup>III</sup>, Gd<sup>III</sup>) and homogeneous control Cu(acac)<sub>2</sub>, Eu(acac)<sub>3</sub>(H<sub>2</sub>O)<sub>3</sub> and Gd(acac)<sub>3</sub>(H<sub>2</sub>O)<sub>3</sub> as catalysts.

| Catalyst                                                | Conv. (%) | Products                                           | Selectivity (%) |
|---------------------------------------------------------|-----------|----------------------------------------------------|-----------------|
| <i>CuSmPDC</i>                                          | 71        | Cyclohexenone<br>Cyclohexenol<br>Cyclohexene oxide | 55<br>42<br>3   |
| <i>Cu(acac)<sub>2</sub></i>                             | 74        | Cyclohexenone<br>Cyclohexenol<br>Cyclohexene oxide | 56<br>41<br>4   |
| <i>CuEuPDC</i>                                          | 69        | Cyclohexenone<br>Cyclohexenol<br>Cyclohexene oxide | 51<br>44<br>5   |
| <i>Eu(acac)<sub>3</sub>(H<sub>2</sub>O)<sub>3</sub></i> | 70        | Cyclohexenone<br>Cyclohexenol<br>Cyclohexene oxide | 38<br>49<br>13  |
| <i>CuGdPDC</i>                                          | 68        | Cyclohexenone<br>Cyclohexenol<br>Cyclohexene oxide | 51<br>43<br>6   |
| <i>Gd(acac)<sub>3</sub>(H<sub>2</sub>O)<sub>3</sub></i> | 70        | Cyclohexenone<br>Cyclohexenol<br>Cyclohexene oxide | 39<br>47<br>14  |
| <i>Blank</i>                                            | 30        | Cyclohexenone<br>Cyclohexenol<br>Cyclohexene oxide | 46<br>43<br>11  |

**Reaction conditions:** Catalyst (0.005 mmol, based on copper (0.00031 mmol)), substrate (10 mmol), 120 °C. Ratio S/C = 32000/1 or 0.003mol% of copper per mole of substrate. The homogeneous control were done using the same amount of metal ions present in the CuLnPDC.

**Table S4.** Catalytic results for the oxidation of cyclooctene, using CuSmPDC.

| <b>Substrate</b>                   | <b>Consumption of O<sub>2</sub> (bar)</b> | <b>Time (h)</b> | <b>Conversion (%)</b> | <b>TOF (h<sup>-1</sup>)</b> | <b>Selectivity (%)</b> |
|------------------------------------|-------------------------------------------|-----------------|-----------------------|-----------------------------|------------------------|
| <b>Cyclooctene</b>                 | 3.5                                       | 6               | 47                    | 159                         | 99 (epoxide)           |
| <b>Cyclooctene + Hydroquinone*</b> | 0                                         | 6               | 0                     | -                           | 0                      |
| <b>Blank</b>                       | 0                                         | 6               | 0                     |                             | 0                      |

**Reaction conditions:** Catalyst (0.005 mmol, based on copper (0.00031 mmol)), substrate (10 mmol), 120 °C. Ratio S/C = 32000/1 or 0.003mol% of copper per mole of substrate. Initial pressure 5 bar. TOF calculated as moles of products per mole of active site (Cu<sup>II</sup> ions) per hour (TOF values were calculated using the time reported in the table).

\*Hydroquinone was used in 20 mol% in relation to cyclooctene.
